# Supplementary material for: Experimental and theoretical aspects of the haptotropic rearrangement of diiron and diruthenium carbonyl complexes bound to 4,6,8-trimethylazulene
Source: Royal Society of Chemistry journal article supplement (doi:10.1039/b719331a), 2008-01-01
Supplement: b719331a.pdf [file b719331a.pdf]

## Supporting information

Experimental and theoretical aspects of the haptotropic rearrangement of diiron and diruthenium carbonyl complexes bound to 4,6,8-trimethylazulene

Kazuhiro Tsuchiya,<sup>c</sup> Keiko Ideta,<sup>b</sup> Koichi Mogi,<sup>c#\*</sup> Yusuke Sunada<sup>c</sup> and Hideo Nagashima<sup>a,c\*</sup>

*Division of Applied Molecular Chemistry<sup>a</sup> and Analytical Center<sup>b</sup> of Institute for Materials Chemistry and Engineering, Department of Molecular and Materials Science,<sup>c</sup> Graduate School of Engineering Sciences, Kyushu University, Kasuga, Fukuoka, 816-8580, Japan*

### S-1. Measurement of SST experiment

S-1-1 The list of data of Fe complex **(3)**

Table S-1-1-1  $T_{1(HI)}$  measurement of Fe **(3)** complex

Table S-1-1-2  $I_{f(HI)}/I_{o(HI)}$  measurement of Fe **(3)** complex

S-1-2 The list of data of Ru complex **(4)**

Table S-1-2-1  $T_{1(HI)}$  measurement of Ru **(4)** complex

Table S-1-2-2  $I_{f(HI)}/I_{o(HI)}$  measurement of Ru **(4)** complex

### S-2. Data of the SST experiment

S-2-1 The list of data of Fe complex **(3)**

Table S-2-1-1 The calculated value of  $\ln(I_{o(HI)}/I_{f(HI)}-1)$

Table S-2-1-2 The calculated value of  $\ln(T_{1(HI)})$

Table S-2-1-3 The calculated value of  $\ln(k/T)$

Table S-2-1-4 The calculated value of  $1000/T$

Table S-2-1-5 The y-intercept and slope values of Eyring plot

Table S-2-1-6 Thermodynamic parameters of complex **3**

S-2-2 The list of data of Ru complex **(4)**

Table S-2-2-1 The calculated value of  $\ln(I_{o(HI)}/I_{f(HI)}-1)$

Table S-2-2-2 The calculated value of  $\ln(T_{1(HI)})$

Table S-2-2-3 The calculated value of  $\ln(k/T)$

Table S-2-2-4 The calculated value of  $1000/T$

Table S-2-2-5 The y-intercept and slope values of Eyring plot

Table S-2-2-6 Thermodynamic parameters of complex **3**

### S-3. x,y,z-coordinates of ground and transition state structures of complex **3** and **4**

Table S-3-1 ground state structures of complex **3**

Table S-3-2 transition state structures of complex **3**

Table S-3-3 ground state structures of complex **4**

Table S-3-4 transition state structures of complex **4**

S-4. Thermodynamic parameters for **3** and **4** by DFT calculation

Table S-4-1. The value of internal energy contributed from each motion

Table S-4-2. The value of entropies contributed from each motion

Table S-4-3. The value of  $\ln q$  contributed from each motion

Table S-4-4. The value of thermochemical parameters at ground state and transition state

Table S-4-5 Thermodynamic parameters for 3 and 4 by DFT calculation with three functionals.

### The spin-saturation transfer (SST) measurement

The SST studies of **3** and **4** were carried out in the temperature range of 349 to 402 K. The spin-lattice relaxation time of H1  $\{T_{1(H1)}\}$  was determined by the standard inversion recovery method as the average of ten measurements at 381, 385, 390, 394, 398 and 402K for the complex **3**, and 349, 353, 358, 363, 367 and 372 K for the complex **4**. At each temperature, ten raw data of  $T_{1(H1)}$  and their average are listed in Tables S-1-1-1 for **3** and S-1-2-1 for **4**. The average data  $\{T_{1(H1)}\}_{av}$  are used for the determination of k as described below. The SST measurement led to change of integral value of the peak due to H1: Ten measurements were performed at each temperature for the determination of  $I_{f(H1)}/I_{0(H1)}$ , where  $I_{f(H1)}$  is the final intensity of H1 while  $I_{0(H1)}$  is the initial intensity as listed in Tables S-1-1-2 for **3** and S-1-2-2 for **4**. The exchange rate k is defined as  $I_{f(H1)}/I_{0(H1)} = \{T_{1(H1)}\}_{av}^{-1} / [k + \{T_{1(H1)}\}_{av}^{-1}]$ , and the values of  $\ln(k/T)$  are calculated according to the following equation.

$$\ln(k/T) = \ln(I_{0(H1)}/I_{f(H1)}-1) - \ln\{T_{1(H1)}\}_{av} - \ln(T) \quad (\text{eq. S-1})$$

The data of  $\ln(k/T)$  are summarized in Tables S-2-1-1 (for **3**) S-2-2-1 (for **4**). The average of  $\ln(k/T)$  at each temperature was adopted to an Eyring plot of  $\ln(k/T)$  vs.  $1000/T$  as shown in Figures S-2-1-1 and S-2-2-1. The best-fit line drawn from a least-squares analysis of the plot provided the enthalpy and entropy of activation from the slope and the intercept, respectively (Table S-2-1-2 and S-2-2-2). The  $\Delta G_{373}^\ddagger$ ,  $\Delta H_{373}^\ddagger$ , and  $\Delta S_{373}^\ddagger$  calculated by the following equation (eq. S-2, where  $k_B$ : Boltzman constant, h: plank constant) for the rearrangement of **3** and **4** are listed in Table S-2-1-3 and S-2-2-3.

$$\ln\left(\frac{k}{T}\right) = \ln\left(\frac{k_B}{h}\right) - \frac{\Delta H}{RT} + \frac{\Delta S}{R} \quad (\text{eq. S-2})$$

**S-1 Data of SST experiment**

**S-1-1 The list of data of Fe complex (3)**

Table S-1-1-1  $\{T_{I(HI)}\}$  measurement of Fe (3) complex

| Complex | Temperature<br>K | The $\{T_{I(HI)}\}$ value observed in each measurement |                 |                 |                 |                 |                 |                 |                 |                 |                  | $\{T_{I(HI)}\}$ of<br>the average |
|---------|------------------|--------------------------------------------------------|-----------------|-----------------|-----------------|-----------------|-----------------|-----------------|-----------------|-----------------|------------------|-----------------------------------|
|         |                  | 1 <sup>st</sup>                                        | 2 <sup>nd</sup> | 3 <sup>rd</sup> | 4 <sup>th</sup> | 5 <sup>th</sup> | 6 <sup>th</sup> | 7 <sup>th</sup> | 8 <sup>th</sup> | 9 <sup>th</sup> | 10 <sup>th</sup> |                                   |
| Fe(3)   | 380.8            | 7.650                                                  | 7.158           | 7.117           | 7.094           | 7.025           | 7.124           | 7.089           | 7.012           | 6.962           | 6.993            | 7.122±0.186                       |
|         | 385.3            | 7.440                                                  | 7.393           | 7.465           | 7.061           | 7.172           | 7.248           | 7.278           | 7.351           | 7.399           | 7.180            | 7.299±0.126                       |
|         | 389.9            | 7.116                                                  | 7.152           | 6.953           | 7.041           | 7.009           | 6.999           | 6.962           | 6.940           | 6.928           | 6.976            | 7.008±0.071                       |
|         | 393.6            | 7.325                                                  | 7.260           | 6.866           | 6.972           | 6.878           | 6.794           | 7.148           | 6.867           | 6.816           | 6.896            | 6.982±0.182                       |
|         | 398.1            | 5.526                                                  | 5.692           | 5.611           | 5.660           | 5.728           | 5.692           | 5.714           | 5.805           | 5.873           | 5.771            | 5.707±0.093                       |
|         | 401.8            | 6.231                                                  | 6.155           | 6.152           | 6.215           | 6.223           | 6.250           | 6.243           | 6.335           | 6.164           | 6.198            | 6.217±0.052                       |

Table S-1-1-2  $I_{\beta(HI)}/I_{0(HI)}$  measurement of Fe (3) complex

| Complex | Temperature<br>K | The $I_{\beta(HI)}/I_{0(HI)}$ value observed in each measurement |                 |                 |                 |                 |                 |                 |                 |                 |                  |
|---------|------------------|------------------------------------------------------------------|-----------------|-----------------|-----------------|-----------------|-----------------|-----------------|-----------------|-----------------|------------------|
|         |                  | 1 <sup>st</sup>                                                  | 2 <sup>nd</sup> | 3 <sup>rd</sup> | 4 <sup>th</sup> | 5 <sup>th</sup> | 6 <sup>th</sup> | 7 <sup>th</sup> | 8 <sup>th</sup> | 9 <sup>th</sup> | 10 <sup>th</sup> |
| Fe(3)   | 380.8            | 0.745                                                            | 0.751           | 0.743           | 0.746           | 0.742           | 0.722           | 0.728           | 0.735           | 0.735           | 0.735            |
|         | 385.3            | 0.639                                                            | 0.672           | 0.673           | 0.667           | 0.627           | 0.639           | 0.644           | 0.612           | 0.635           | 0.620            |
|         | 389.9            | 0.564                                                            | 0.569           | 0.578           | 0.568           | 0.560           | 0.578           | 0.572           | 0.572           | 0.574           | 0.567            |
|         | 393.6            | 0.507                                                            | 0.500           | 0.513           | 0.510           | 0.524           | 0.518           | 0.520           | 0.510           | 0.516           | 0.513            |
|         | 398.1            | 0.473                                                            | 0.493           | 0.483           | 0.512           | 0.503           | 0.493           | 0.495           | 0.494           | 0.489           | 0.484            |
|         | 401.8            | 0.416                                                            | 0.397           | 0.402           | 0.404           | 0.409           | 0.405           | 0.400           | 0.403           | 0.397           | 0.378            |

S-1-2 The list of data of Ru complex (4)

Table S-1-2-1  $\{T_{I(HI)}\}$  measurement of Ru (4) complex

| Complex | Temperature<br>K | The $\{T_{I(HI)}\}$ value observed in each measurement |                 |                 |                 |                 |                 |                 |                 |                 |                  | $\{T_{I(HI)}\}$ of<br>the average |
|---------|------------------|--------------------------------------------------------|-----------------|-----------------|-----------------|-----------------|-----------------|-----------------|-----------------|-----------------|------------------|-----------------------------------|
|         |                  | 1 <sup>st</sup>                                        | 2 <sup>nd</sup> | 3 <sup>rd</sup> | 4 <sup>th</sup> | 5 <sup>th</sup> | 6 <sup>th</sup> | 7 <sup>th</sup> | 8 <sup>th</sup> | 9 <sup>th</sup> | 10 <sup>th</sup> |                                   |
| Ru(4)   | 348.8            | 6.436                                                  | 6.255           | 6.522           | 7.236           | 6.412           | 6.620           | 6.286           | 6.428           | 6.689           | 6.562            | $6.545 \pm 0.264$                 |
|         | 353.4            | 8.068                                                  | 7.113           | 7.644           | 7.167           | 8.012           | 6.984           | 7.191           | 6.721           | 6.712           | 7.581            | $7.319 \pm 0.462$                 |
|         | 357.9            | 7.568                                                  | 7.523           | 7.466           | 7.503           | 7.509           | 7.315           | 7.426           | 7.434           | 7.450           | 7.287            | $7.448 \pm 0.084$                 |
|         | 362.5            | 7.440                                                  | 7.393           | 7.465           | 7.061           | 7.172           | 7.248           | 7.278           | 7.351           | 7.399           | 7.180            | $7.299 \pm 0.126$                 |
|         | 367.1            | 7.061                                                  | 7.078           | 7.063           | 7.041           | 7.113           | 6.977           | 7.131           | 7.155           | 7.257           | 7.274            | $7.115 \pm 0.089$                 |
|         | 371.6            | 6.903                                                  | 6.698           | 6.925           | 6.425           | 6.355           | 6.792           | 8.087           | 7.910           | 6.677           | 6.841            | $6.961 \pm 0.550$                 |

Table S-1-2-2  $I_{\beta(HI)}/I_{0(HI)}$  measurement of Ru (4) complex

| Complex | Temperature<br>K | The $I_{\beta(HI)}/I_{0(HI)}$ value observed in each measurement |                 |                 |                 |                 |                 |                 |                 |                 |                  |
|---------|------------------|------------------------------------------------------------------|-----------------|-----------------|-----------------|-----------------|-----------------|-----------------|-----------------|-----------------|------------------|
|         |                  | 1 <sup>st</sup>                                                  | 2 <sup>nd</sup> | 3 <sup>rd</sup> | 4 <sup>th</sup> | 5 <sup>th</sup> | 6 <sup>th</sup> | 7 <sup>th</sup> | 8 <sup>th</sup> | 9 <sup>th</sup> | 10 <sup>th</sup> |
| Ru(4)   | 348.8            | 0.844                                                            | 0.846           | 0.843           | 0.841           | 0.842           | 0.853           | 0.835           | 0.831           | 0.844           | 0.834            |
|         | 353.4            | 0.704                                                            | 0.740           | 0.747           | 0.747           | 0.766           | 0.704           | 0.750           | 0.729           | 0.763           | 0.768            |
|         | 357.9            | 0.627                                                            | 0.631           | 0.627           | 0.608           | 0.621           | 0.615           | 0.622           | 0.619           | 0.618           | 0.617            |
|         | 362.5            | 0.531                                                            | 0.524           | 0.521           | 0.522           | 0.524           | 0.532           | 0.526           | 0.530           | 0.527           | 0.531            |
|         | 367.1            | 0.403                                                            | 0.396           | 0.402           | 0.399           | 0.399           | 0.403           | 0.402           | 0.402           | 0.402           | 0.402            |
|         | 371.6            | 0.354                                                            | 0.314           | 0.325           | 0.330           | 0.332           | 0.338           | 0.344           | 0.355           | 0.318           | 0.322            |

## S-2 Data of the SST measurement

### S-2-1 The list of data of Fe complex (3)

Table S-2-1-1 The calculated values of  $\ln(k/T)$

| Exp. No.<br>K | 1 <sup>st</sup> | 2 <sup>nd</sup> | 3 <sup>rd</sup> | 4 <sup>th</sup> | 5 <sup>th</sup> | 6 <sup>th</sup> | 7 <sup>th</sup> | 8 <sup>th</sup> | 9 <sup>th</sup> | 10 <sup>th</sup> | average        |
|---------------|-----------------|-----------------|-----------------|-----------------|-----------------|-----------------|-----------------|-----------------|-----------------|------------------|----------------|
| 380.8         | -8.979          | -9.009          | -8.967          | -8.985          | -8.964          | -8.858          | -8.891          | -8.926          | -8.927          | -8.927           | -8.943 ± 0.044 |
| 385.3         | -8.514          | -8.659          | -8.663          | -8.637          | -8.459          | -8.514          | -8.535          | -8.399          | -8.494          | -8.433           | -8.531 ± 0.089 |
| 389.9         | -8.169          | -8.191          | -8.227          | -8.185          | -8.153          | -8.226          | -8.203          | -8.202          | -8.210          | -8.182           | -8.195 ± 0.023 |
| 393.6         | -7.947          | -7.919          | -7.972          | -7.961          | -8.015          | -7.990          | -7.997          | -7.957          | -7.982          | -7.972           | -7.971 ± 0.026 |
| 398.1         | -7.620          | -7.700          | -7.662          | -7.778          | -7.740          | -7.701          | -7.709          | -7.706          | -7.686          | -7.666           | -7.697 ± 0.041 |
| 401.8         | -7.484          | -7.404          | -7.427          | -7.433          | -7.455          | -7.440          | -7.419          | -7.431          | -7.404          | -7.325           | -7.422 ± 0.039 |

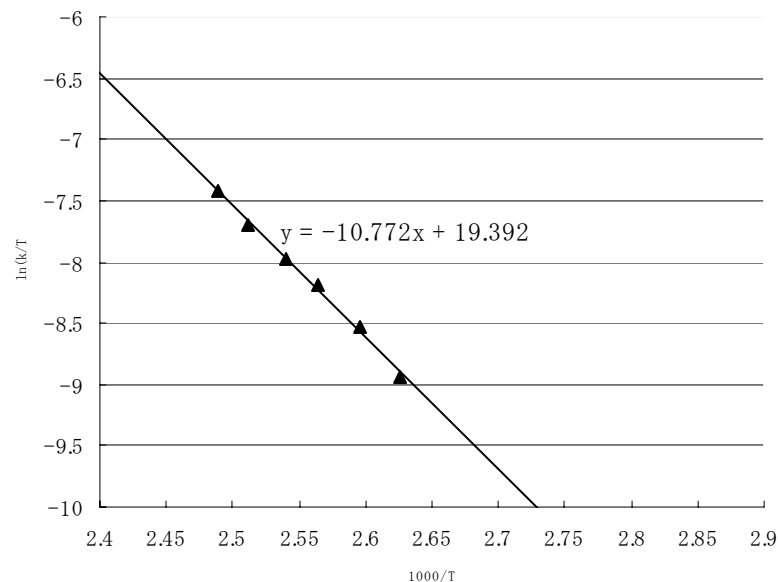

Fig. S-2-1-1. Eyring plot for the haptotropic rearrangement of **3**

Table S-2-1-2 The y-intercept and slope values of Eyring plot

|             | (least square method) |
|-------------|-----------------------|
| y-intercept | 19.392 ± 0.352        |
| slope       | -10.722 ± 0.056       |

Table S-2-1-3 Thermodynamic parameters of complex **3**

|                           |                                             |                                              |
|---------------------------|---------------------------------------------|----------------------------------------------|
| $\Delta S^\ddagger$       | -33 ± 3 J K <sup>-1</sup> mol <sup>-1</sup> | -8 ± 1 cal K <sup>-1</sup> mol <sup>-1</sup> |
| $\Delta H^\ddagger$       | 89 ± 1 kJ mol <sup>-1</sup>                 | 21 ± 1 kcal mol <sup>-1</sup>                |
| $\Delta G^\ddagger_{373}$ | 101 ± 2 kJ mol <sup>-1</sup>                | 24 ± 1 kcal mol <sup>-1</sup>                |

S-2-2 The list of data of Ru complex (4)

Table S-2-2-1 The calculated value of  $\ln(k/T)$

| exp.No.<br>K | 1 <sup>st</sup> | 2 <sup>nd</sup> | 3 <sup>rd</sup> | 4 <sup>th</sup> | 5 <sup>th</sup> | 6 <sup>th</sup> | 7 <sup>th</sup> | 8 <sup>th</sup> | 9 <sup>th</sup> | 10 <sup>th</sup> | average            |
|--------------|-----------------|-----------------|-----------------|-----------------|-----------------|-----------------|-----------------|-----------------|-----------------|------------------|--------------------|
| 348.8        | -9.420          | -9.436          | -9.417          | -9.399          | -9.408          | -9.490          | -9.352          | -9.327          | -9.420          | -9.348           | $-9.402 \pm 0.046$ |
| 353.4        | -8.724          | -8.904          | -8.942          | -8.942          | -9.044          | -8.722          | -8.954          | -8.845          | -9.029          | -9.055           | $-8.916 \pm 0.114$ |
| 357.9        | -8.408          | -8.425          | -8.406          | -8.326          | -8.380          | -8.357          | -8.388          | -8.375          | -8.371          | -8.364           | $-8.380 \pm 0.027$ |
| 362.5        | -8.006          | -7.976          | -7.964          | -7.969          | -7.975          | -8.007          | -7.985          | -8.001          | -7.988          | -8.004           | $-7.988 \pm 0.015$ |
| 367.1        | -7.475          | -7.445          | -7.469          | -7.460          | -7.458          | -7.477          | -7.472          | -7.471          | -7.470          | -7.472           | $-7.467 \pm 0.009$ |
| 371.6        | -7.255          | -7.078          | -7.129          | -7.152          | -7.161          | -7.186          | -7.212          | -7.261          | -7.094          | -7.112           | $-7.164 \pm 0.061$ |

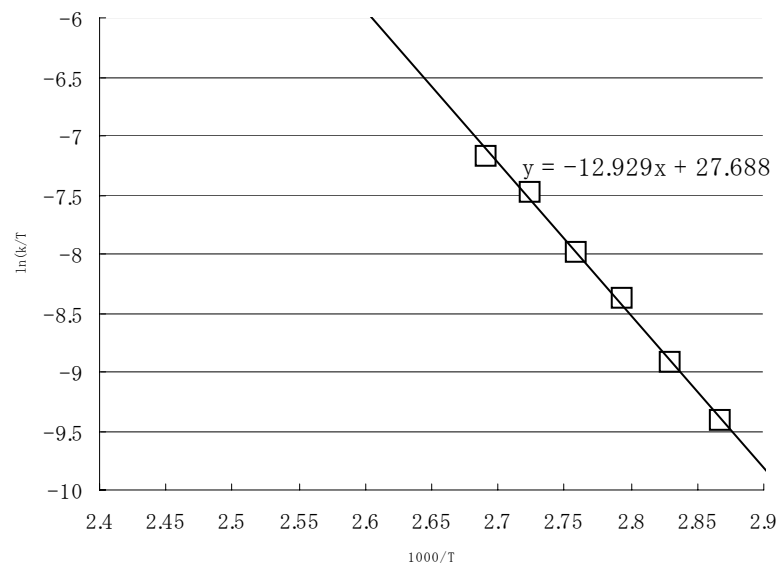

Fig. S-2-2-1. Eyring plot for the haptotropic rearrangement of **4**

Table S-2-2-2 The y-intercept and slope values of Eyring plot

| (least square method) |                     |
|-----------------------|---------------------|
| y-intercept           | $27.688 \pm 0.424$  |
| slope                 | $-12.929 \pm 0.062$ |

Table S-2-2-3 Thermodynamic parameters of complex **4**

|                           |                                              |                                               |
|---------------------------|----------------------------------------------|-----------------------------------------------|
| $\Delta S^\ddagger$       | $29 \pm 4 \text{ J K}^{-1} \text{ mol}^{-1}$ | $8 \pm 1 \text{ cal K}^{-1} \text{ mol}^{-1}$ |
| $\Delta H^\ddagger$       | $106 \pm 1 \text{ kJ mol}^{-1}$              | $26 \pm 1 \text{ kcal mol}^{-1}$              |
| $\Delta G^\ddagger_{373}$ | $95 \pm 2 \text{ kJ mol}^{-1}$               | $22 \pm 1 \text{ kcal mol}^{-1}$              |

**S-3** x,y,z-coordinates of ground and transition state structures of complex 3 and 4

Table S-3-1 ground state structures of complex 3

| Fe (3) |        |        |        |    |        |         |        |    |        |        |        |
|--------|--------|--------|--------|----|--------|---------|--------|----|--------|--------|--------|
| B3LYP  |        |        | B1B95  |    |        | PBE1PBE |        |    |        |        |        |
|        | x      | y      | z      |    | x      | y       | Z      |    | x      | y      | z      |
| Fe     | 0.928  | -0.085 | 1.304  | Fe | -1.410 | -0.582  | 0.109  | Fe | -1.452 | -0.528 | 0.128  |
| Fe     | -1.131 | -0.562 | -0.613 | Fe | 1.299  | -0.269  | 0.189  | Fe | 1.306  | -0.339 | 0.147  |
| C      | -0.093 | 1.633  | 0.578  | C  | -0.494 | 0.142   | -1.625 | C  | -0.564 | 0.235  | -1.605 |
| C      | -0.101 | 1.617  | 2.018  | C  | -1.277 | -1.027  | -1.909 | C  | -1.426 | -0.872 | -1.920 |
| C      | 1.242  | 1.648  | 2.493  | C  | -2.628 | -0.779  | -1.561 | C  | -2.749 | -0.566 | -1.499 |
| C      | 2.098  | 1.683  | 1.367  | C  | -2.705 | 0.535   | -1.055 | C  | -2.731 | 0.724  | -0.923 |
| C      | 1.304  | 1.655  | 0.167  | C  | -1.397 | 1.118   | -1.058 | C  | -1.390 | 1.237  | -0.958 |
| C      | 1.862  | 1.559  | -1.186 | C  | -1.081 | 2.402   | -0.440 | C  | -0.977 | 2.482  | -0.314 |
| C      | 1.159  | 1.052  | -2.224 | C  | 0.150  | 2.673   | 0.030  | C  | 0.285  | 2.674  | 0.119  |
| C      | -0.250 | 0.634  | -2.322 | C  | 1.397  | 1.901   | -0.063 | C  | 1.490  | 1.847  | -0.044 |
| C      | -1.311 | 1.266  | -1.601 | C  | 1.764  | 1.142   | -1.214 | C  | 1.767  | 1.099  | -1.229 |
| C      | -1.314 | 1.579  | -0.225 | C  | 0.942  | 0.197   | -1.851 | C  | 0.871  | 0.214  | -1.863 |
| H      | 1.552  | 1.641  | 3.535  | H  | -3.452 | -1.478  | -1.658 | H  | -3.617 | -1.214 | -1.596 |
| H      | 3.184  | 1.698  | 1.400  | H  | -3.603 | 1.021   | -0.687 | H  | -3.588 | 1.236  | -0.493 |
| C      | 3.311  | 1.946  | -1.360 | C  | -2.218 | 3.350   | -0.211 | C  | -2.047 | 3.499  | -0.040 |
| H      | 1.710  | 0.939  | -3.164 | H  | 0.262  | 3.618   | 0.568  | H  | 0.466  | 3.602  | 0.673  |
| C      | -2.519 | -1.173 | -1.539 | C  | 3.018  | -0.470  | 0.518  | C  | 3.020  | -0.628 | 0.378  |
| O      | -3.419 | -1.617 | -2.108 | O  | 4.124  | -0.644  | 0.765  | O  | 4.132  | -0.862 | 0.561  |
| C      | -0.056 | -1.969 | -0.900 | C  | 0.802  | -0.161  | 1.895  | C  | 0.902  | -0.243 | 1.872  |
| O      | 0.523  | -2.931 | -1.171 | O  | 0.652  | -0.098  | 3.033  | O  | 0.801  | -0.199 | 3.018  |
| C      | -1.934 | -1.001 | 0.927  | C  | 1.127  | -2.009  | -0.140 | C  | 1.053  | -2.058 | -0.199 |
| O      | -2.524 | -1.261 | 1.884  | O  | 1.069  | -3.124  | -0.409 | O  | 0.960  | -3.174 | -0.467 |
| C      | 0.538  | -1.253 | 2.584  | C  | -1.606 | -2.196  | 0.800  | C  | -1.713 | -2.161 | 0.722  |
| O      | 0.321  | -1.978 | 3.454  | O  | -1.790 | -3.246  | 1.227  | O  | -1.942 | -3.227 | 1.091  |
| C      | 2.197  | -1.128 | 0.633  | C  | -1.890 | 0.199   | 1.617  | C  | -1.828 | 0.160  | 1.700  |
| O      | 3.090  | -1.740 | 0.234  | O  | -2.291 | 0.745   | 2.543  | O  | -2.166 | 0.643  | 2.688  |
| H      | 3.499  | 2.974  | -1.007 | H  | -2.768 | 3.555   | -1.140 | H  | -2.587 | 3.774  | -0.960 |
| H      | 3.983  | 1.281  | -0.789 | H  | -2.942 | 2.938   | 0.509  | H  | -2.796 | 3.117  | 0.674  |
| H      | 3.609  | 1.887  | -2.416 | H  | -1.858 | 4.302   | 0.194  | H  | -1.617 | 4.413  | 0.393  |



|   |        |        |        |   |        |        |        |   |        |        |        |
|---|--------|--------|--------|---|--------|--------|--------|---|--------|--------|--------|
| H | -2.261 | 1.407  | -2.123 | H | 2.807  | 1.169  | -1.536 | H | 2.797  | 1.089  | -1.600 |
| H | -0.987 | 1.582  | 2.645  | H | -0.891 | -1.957 | -2.314 | H | -1.115 | -1.801 | -2.388 |
| C | -2.569 | 2.186  | 0.371  | C | 1.512  | -0.617 | -2.982 | C | 1.360  | -0.575 | -3.052 |
| H | -2.806 | 1.779  | 1.364  | H | 1.211  | -1.670 | -2.931 | H | 0.990  | -1.609 | -3.054 |
| H | -2.451 | 3.278  | 0.486  | H | 1.170  | -0.225 | -3.952 | H | 1.023  | -0.105 | -3.991 |
| H | -3.439 | 2.001  | -0.276 | H | 2.608  | -0.587 | -2.963 | H | 2.458  | -0.619 | -3.063 |
| C | -0.596 | 0.146  | -3.725 | C | 2.538  | 2.600  | 0.647  | C | 2.692  | 2.476  | 0.635  |
| H | -0.369 | 0.927  | -4.474 | H | 2.675  | 3.619  | 0.252  | H | 2.853  | 3.503  | 0.263  |
| H | -0.001 | -0.740 | -3.992 | H | 2.334  | 2.694  | 1.721  | H | 2.537  | 2.545  | 1.722  |
| H | -1.657 | -0.120 | -3.830 | H | 3.487  | 2.063  | 0.534  | H | 3.616  | 1.908  | 0.465  |

Table S-3-2 transition state structures of complex 3

| Fe(TS) (3) |        |        |        |    |        |         |        |    |        |        |        |
|------------|--------|--------|--------|----|--------|---------|--------|----|--------|--------|--------|
| B3LYP      |        |        | B1B95  |    |        | PBE1PBE |        |    |        |        |        |
|            | x      | y      | z      |    | x      | y       | z      |    | x      | y      | z      |
| Fe         | -0.431 | -1.567 | 0.000  | Fe | -0.348 | -1.539  | 0.000  | Fe | -0.390 | -1.525 | 0.000  |
| Fe         | -0.698 | 1.189  | 0.000  | Fe | -0.665 | 1.104   | 0.000  | Fe | -0.634 | 1.106  | 0.000  |
| C          | 0.945  | -3.170 | 0.000  | C  | 1.013  | -3.092  | 0.000  | C  | 0.923  | -3.137 | 0.000  |
| C          | 1.253  | 1.990  | 0.000  | C  | 1.165  | 2.049   | 0.000  | C  | 1.203  | 2.002  | 0.000  |
| C          | 1.187  | -2.361 | 1.147  | C  | 1.234  | -2.280  | 1.142  | C  | 1.162  | -2.327 | 1.145  |
| C          | 1.187  | -2.361 | -1.147 | C  | 1.234  | -2.280  | -1.142 | C  | 1.162  | -2.327 | -1.145 |
| C          | 1.530  | -1.038 | 0.729  | C  | 1.539  | -0.955  | 0.724  | C  | 1.529  | -1.011 | 0.724  |
| C          | 1.530  | -1.038 | -0.729 | C  | 1.539  | -0.955  | -0.724 | C  | 1.529  | -1.011 | -0.724 |
| C          | 1.695  | 1.387  | 1.270  | C  | 1.603  | 1.464   | 1.268  | C  | 1.667  | 1.410  | 1.265  |
| C          | 1.695  | 1.387  | -1.270 | C  | 1.603  | 1.464   | -1.268 | C  | 1.667  | 1.410  | -1.265 |
| C          | 1.827  | 0.075  | 1.628  | C  | 1.778  | 0.161   | 1.623  | C  | 1.797  | 0.102  | 1.628  |
| C          | 1.827  | 0.075  | -1.628 | C  | 1.778  | 0.161   | -1.623 | C  | 1.797  | 0.102  | -1.628 |
| H          | 0.663  | -4.219 | 0.000  | H  | 0.756  | -4.146  | 0.000  | H  | 0.595  | -4.174 | 0.000  |
| H          | 1.088  | -2.686 | -2.179 | H  | 1.140  | -2.604  | -2.172 | H  | 1.089  | -2.653 | -2.180 |
| H          | 1.876  | 2.114  | -2.070 | H  | 1.725  | 2.190   | -2.076 | H  | 1.825  | 2.138  | -2.068 |
| C          | 2.162  | -0.276 | -3.056 | C  | 2.062  | -0.182  | -3.052 | C  | 2.097  | -0.247 | -3.054 |
| H          | 2.487  | 0.610  | -3.618 | H  | 2.348  | 0.707   | -3.625 | H  | 2.432  | 0.635  | -3.615 |
| H          | 2.959  | -1.036 | -3.111 | H  | 2.864  | -0.928  | -3.136 | H  | 2.870  | -1.026 | -3.129 |
| H          | 1.281  | -0.692 | -3.578 | H  | 1.168  | -0.613  | -3.531 | H  | 1.194  | -0.632 | -3.560 |
| C          | 2.162  | -0.276 | 3.056  | C  | 2.062  | -0.182  | 3.052  | C  | 2.097  | -0.247 | 3.054  |

|   |        |        |        |   |        |        |        |   |        |        |        |
|---|--------|--------|--------|---|--------|--------|--------|---|--------|--------|--------|
| H | 2.487  | 0.610  | 3.618  | H | 2.348  | 0.707  | 3.625  | H | 2.432  | 0.635  | 3.615  |
| H | 1.281  | -0.692 | 3.578  | H | 1.168  | -0.613 | 3.531  | H | 1.194  | -0.632 | 3.560  |
| H | 2.959  | -1.036 | 3.111  | H | 2.864  | -0.928 | 3.136  | H | 2.870  | -1.026 | 3.129  |
| C | 1.410  | 3.511  | 0.000  | C | 1.231  | 3.564  | 0.000  | C | 1.300  | 3.517  | 0.000  |
| H | 0.944  | 3.962  | -0.889 | H | 0.738  | 3.981  | -0.886 | H | 0.812  | 3.944  | -0.888 |
| H | 0.944  | 3.962  | 0.889  | H | 0.738  | 3.981  | 0.886  | H | 0.812  | 3.944  | 0.888  |
| H | 2.478  | 3.799  | 0.000  | H | 2.275  | 3.916  | 0.000  | H | 2.352  | 3.852  | 0.000  |
| H | 1.088  | -2.686 | 2.179  | H | 1.140  | -2.604 | 2.172  | H | 1.089  | -2.653 | 2.180  |
| H | 1.876  | 2.114  | 2.070  | H | 1.725  | 2.190  | 2.076  | H | 1.825  | 2.138  | 2.068  |
| C | -1.005 | 0.963  | -1.794 | C | -0.982 | 0.873  | -1.781 | C | -0.929 | 0.918  | -1.787 |
| O | -1.304 | 0.887  | -2.905 | O | -1.274 | 0.730  | -2.883 | O | -1.219 | 0.870  | -2.900 |
| C | -1.651 | -1.791 | -1.264 | C | -1.573 | -1.782 | -1.242 | C | -1.628 | -1.718 | -1.239 |
| C | -1.651 | -1.791 | 1.264  | C | -1.573 | -1.782 | 1.242  | C | -1.628 | -1.718 | 1.239  |
| C | -1.005 | 0.963  | 1.794  | C | -0.982 | 0.873  | 1.781  | C | -0.929 | 0.918  | 1.787  |
| C | -1.519 | 2.738  | 0.000  | C | -1.574 | 2.582  | 0.000  | C | -1.575 | 2.562  | 0.000  |
| O | -2.428 | -2.018 | 2.088  | O | -2.354 | -2.017 | 2.052  | O | -2.430 | -1.923 | 2.039  |
| O | -2.428 | -2.018 | -2.088 | O | -2.354 | -2.017 | -2.052 | O | -2.430 | -1.923 | -2.039 |
| O | -1.304 | 0.887  | 2.905  | O | -1.274 | 0.730  | 2.883  | O | -1.219 | 0.870  | 2.900  |
| O | -2.101 | 3.735  | 0.000  | O | -2.193 | 3.551  | 0.000  | O | -2.229 | 3.508  | 0.000  |

Table S-3-3 ground state structures of complex 4

| Ru (4) |        |        |        |    |        |         |        |    |        |        |        |
|--------|--------|--------|--------|----|--------|---------|--------|----|--------|--------|--------|
| B3LYP  |        |        | B1B95  |    |        | PBE1PBE |        |    |        |        |        |
|        | x      | y      | z      |    | x      | y       | z      |    | x      | y      | z      |
| Ru     | 1.018  | -0.143 | 1.296  | Ru | 1.521  | -0.488  | -0.025 | Ru | -1.541 | -0.466 | 0.060  |
| Ru     | -1.169 | -0.505 | -0.683 | Ru | -1.351 | -0.334  | -0.132 | Ru | 1.360  | -0.366 | 0.087  |
| C      | 0.010  | 1.809  | 0.572  | C  | 0.519  | 0.673   | 1.645  | C  | -0.574 | 0.731  | -1.614 |
| C      | 0.040  | 1.804  | 2.014  | C  | 1.385  | -0.330  | 2.204  | C  | -1.491 | -0.226 | -2.177 |
| C      | 1.396  | 1.825  | 2.457  | C  | 2.727  | -0.054  | 1.829  | C  | -2.811 | 0.069  | -1.735 |
| C      | 2.227  | 1.821  | 1.307  | C  | 2.716  | 1.100   | 1.012  | C  | -2.736 | 1.196  | -0.878 |
| C      | 1.404  | 1.782  | 0.125  | C  | 1.362  | 1.552   | 0.854  | C  | -1.364 | 1.611  | -0.762 |
| C      | 1.928  | 1.688  | -1.239 | C  | 0.959  | 2.644   | -0.025 | C  | -0.901 | 2.674  | 0.127  |
| C      | 1.180  | 1.264  | -2.286 | C  | -0.294 | 2.756   | -0.504 | C  | 0.376  | 2.752  | 0.558  |
| C      | -0.247 | 0.927  | -2.385 | C  | -1.507 | 1.982   | -0.217 | C  | 1.564  | 1.963  | 0.206  |
| C      | -1.269 | 1.551  | -1.591 | C  | -1.802 | 1.446   | 1.080  | C  | 1.792  | 1.434  | -1.110 |

|   |        |        |        |   |        |        |        |   |        |        |        |
|---|--------|--------|--------|---|--------|--------|--------|---|--------|--------|--------|
| C | -1.228 | 1.812  | -0.203 | C | -0.918 | 0.690  | 1.874  | C | 0.858  | 0.714  | -1.886 |
| H | 1.730  | 1.861  | 3.491  | H | 3.605  | -0.615 | 2.133  | H | -3.716 | -0.460 | -2.022 |
| H | 3.313  | 1.847  | 1.315  | H | 3.589  | 1.574  | 0.576  | H | -3.581 | 1.677  | -0.390 |
| C | 3.399  | 1.977  | -1.427 | C | 2.038  | 3.579  | -0.485 | C | -1.941 | 3.620  | 0.653  |
| H | 1.716  | 1.147  | -3.234 | H | -0.454 | 3.558  | -1.230 | H | 0.580  | 3.535  | 1.297  |
| C | -2.679 | -1.003 | -1.775 | C | -3.235 | -0.580 | -0.355 | C | 3.238  | -0.651 | 0.238  |
| O | -3.578 | -1.367 | -2.396 | O | -4.351 | -0.787 | -0.521 | O | 4.356  | -0.888 | 0.359  |
| C | -0.095 | -2.119 | -1.026 | C | -0.856 | -0.674 | -1.990 | C | 0.932  | -0.723 | 1.951  |
| O | 0.418  | -3.109 | -1.310 | O | -0.713 | -0.889 | -3.106 | O | 0.830  | -0.959 | 3.070  |
| C | -2.109 | -1.082 | 0.926  | C | -1.138 | -2.137 | 0.554  | C | 1.111  | -2.149 | -0.614 |
| O | -2.706 | -1.394 | 1.859  | O | -1.035 | -3.184 | 1.005  | O | 0.996  | -3.195 | -1.070 |
| C | 0.530  | -1.432 | 2.618  | C | 1.780  | -2.340 | -0.377 | C | -1.837 | -2.317 | 0.339  |
| O | 0.256  | -2.175 | 3.459  | O | 1.975  | -3.458 | -0.561 | O | -2.060 | -3.438 | 0.480  |
| C | 2.288  | -1.377 | 0.577  | C | 1.934  | -0.104 | -1.842 | C | -1.893 | -0.153 | 1.895  |
| O | 3.124  | -2.064 | 0.173  | O | 2.255  | 0.169  | -2.911 | O | -2.185 | 0.082  | 2.984  |
| H | 3.666  | 2.982  | -1.058 | H | 2.572  | 4.029  | 0.363  | H | -2.494 | 4.110  | -0.164 |
| H | 4.027  | 1.254  | -0.876 | H | 2.788  | 3.055  | -1.098 | H | -2.684 | 3.094  | 1.278  |
| H | 3.679  | 1.917  | -2.487 | H | 1.619  | 4.386  | -1.095 | H | -1.483 | 4.402  | 1.273  |
| H | -0.831 | 1.829  | 2.662  | H | 1.069  | -1.142 | 2.851  | H | -1.224 | -1.026 | -2.864 |
| H | -2.223 | 1.760  | -2.083 | H | -2.833 | 1.505  | 1.434  | H | 2.810  | 1.482  | -1.508 |
| C | -0.649 | 0.579  | -3.816 | C | -2.705 | 2.524  | -0.973 | C | 2.803  | 2.474  | 0.921  |
| H | -0.435 | 1.424  | -4.495 | H | -2.868 | 3.587  | -0.733 | H | 2.974  | 3.540  | 0.689  |
| H | -0.078 | -0.287 | -4.186 | H | -2.550 | 2.455  | -2.057 | H | 2.689  | 2.391  | 2.012  |
| H | -1.716 | 0.336  | -3.904 | H | -3.625 | 1.978  | -0.734 | H | 3.707  | 1.917  | 0.640  |
| C | -2.453 | 2.430  | 0.446  | C | -1.426 | 0.113  | 3.170  | C | 1.307  | 0.159  | -3.216 |
| H | -2.678 | 1.987  | 1.426  | H | -1.063 | -0.906 | 3.343  | H | 0.916  | -0.850 | -3.403 |
| H | -2.301 | 3.512  | 0.602  | H | -1.094 | 0.728  | 4.020  | H | 0.959  | 0.805  | -4.039 |
| H | -3.341 | 2.294  | -0.188 | H | -2.521 | 0.079  | 3.174  | H | 2.403  | 0.100  | -3.262 |

Table S-3-4 transition state structures of complex 4

| Ru(TS) (4) |        |        |       |    |        |         |       |    |        |        |       |
|------------|--------|--------|-------|----|--------|---------|-------|----|--------|--------|-------|
| B3LYP      |        |        | B1B95 |    |        | PBE1PBE |       |    |        |        |       |
| x          | y      | z      | x     | y  | z      | x       | y     | z  |        |        |       |
| Ru         | -0.350 | -1.657 | 0.000 | Ru | -0.415 | -1.604  | 0.000 | Ru | -0.446 | -1.598 | 0.000 |
| Ru         | -0.724 | 1.248  | 0.000 | Ru | -0.578 | 1.242   | 0.000 | Ru | -0.587 | 1.261  | 0.000 |
| C          | 1.423  | -3.199 | 0.000 | C  | 1.170  | -3.244  | 0.000 | C  | 1.121  | -3.269 | 0.000 |

|   |        |        |        |   |        |        |        |   |        |        |        |
|---|--------|--------|--------|---|--------|--------|--------|---|--------|--------|--------|
| C | 1.428  | 2.028  | 0.000  | C | 1.530  | 1.955  | 0.000  | C | 1.525  | 1.926  | 0.000  |
| C | 1.558  | -2.369 | 1.148  | C | 1.367  | -2.430 | 1.139  | C | 1.333  | -2.455 | 1.146  |
| C | 1.558  | -2.369 | -1.148 | C | 1.367  | -2.430 | -1.139 | C | 1.333  | -2.455 | -1.146 |
| C | 1.776  | -1.013 | 0.732  | C | 1.672  | -1.098 | 0.726  | C | 1.666  | -1.127 | 0.729  |
| C | 1.776  | -1.013 | -0.732 | C | 1.672  | -1.098 | -0.726 | C | 1.666  | -1.127 | -0.729 |
| C | 1.807  | 1.422  | 1.277  | C | 1.843  | 1.323  | 1.275  | C | 1.865  | 1.294  | 1.274  |
| C | 1.807  | 1.422  | -1.277 | C | 1.843  | 1.323  | -1.275 | C | 1.865  | 1.294  | -1.274 |
| C | 1.970  | 0.109  | 1.634  | C | 1.905  | 0.006  | 1.631  | C | 1.937  | -0.024 | 1.630  |
| C | 1.970  | 0.109  | -1.634 | C | 1.905  | 0.006  | -1.631 | C | 1.937  | -0.024 | -1.630 |
| H | 1.262  | -4.274 | 0.000  | H | 0.943  | -4.305 | 0.000  | H | 0.869  | -4.326 | 0.000  |
| H | 1.514  | -2.711 | -2.179 | H | 1.295  | -2.759 | -2.178 | H | 1.256  | -2.790 | -2.178 |
| H | 1.917  | 2.146  | -2.091 | H | 1.974  | 2.040  | -2.090 | H | 2.023  | 2.008  | -2.090 |
| C | 2.246  | -0.223 | -3.081 | C | 2.069  | -0.331 | -3.080 | C | 2.166  | -0.374 | -3.071 |
| H | 2.473  | 0.682  | -3.661 | H | 2.330  | 0.554  | -3.670 | H | 2.457  | 0.510  | -3.653 |
| H | 3.092  | -0.923 | -3.181 | H | 2.842  | -1.096 | -3.232 | H | 2.950  | -1.139 | -3.182 |
| H | 1.369  | -0.705 | -3.549 | H | 1.126  | -0.733 | -3.486 | H | 1.246  | -0.781 | -3.526 |
| C | 2.246  | -0.223 | 3.081  | C | 2.069  | -0.331 | 3.080  | C | 2.166  | -0.374 | 3.071  |
| H | 2.473  | 0.682  | 3.661  | H | 2.330  | 0.554  | 3.670  | H | 2.457  | 0.510  | 3.653  |
| H | 1.369  | -0.705 | 3.549  | H | 1.126  | -0.733 | 3.486  | H | 1.246  | -0.781 | 3.526  |
| H | 3.092  | -0.923 | 3.181  | H | 2.842  | -1.096 | 3.232  | H | 2.950  | -1.139 | 3.182  |
| C | 1.575  | 3.548  | 0.000  | C | 1.750  | 3.454  | 0.000  | C | 1.782  | 3.423  | 0.000  |
| H | 1.112  | 3.998  | -0.890 | H | 1.307  | 3.920  | -0.882 | H | 1.350  | 3.903  | -0.889 |
| H | 1.112  | 3.998  | 0.890  | H | 1.307  | 3.920  | 0.882  | H | 1.350  | 3.903  | 0.889  |
| H | 2.645  | 3.827  | 0.000  | H | 2.827  | 3.685  | 0.000  | H | 2.867  | 3.626  | 0.000  |
| H | 1.514  | -2.711 | 2.179  | H | 1.295  | -2.759 | 2.178  | H | 1.256  | -2.790 | 2.178  |
| H | 1.917  | 2.146  | 2.091  | H | 1.974  | 2.040  | 2.090  | H | 2.023  | 2.008  | 2.090  |
| C | -1.050 | 1.070  | -1.954 | C | -0.910 | 1.055  | -1.934 | C | -0.922 | 1.106  | -1.935 |
| O | -1.297 | 1.018  | -3.077 | O | -1.145 | 0.985  | -3.054 | O | -1.174 | 1.070  | -3.055 |
| C | -1.696 | -1.852 | -1.333 | C | -1.792 | -1.695 | -1.306 | C | -1.805 | -1.679 | -1.312 |
| C | -1.696 | -1.852 | 1.333  | C | -1.792 | -1.695 | 1.306  | C | -1.805 | -1.679 | 1.312  |
| C | -1.050 | 1.070  | 1.954  | C | -0.910 | 1.055  | 1.934  | C | -0.922 | 1.106  | 1.935  |
| C | -1.489 | 2.971  | 0.000  | C | -1.300 | 2.966  | 0.000  | C | -1.273 | 2.995  | 0.000  |
| O | -2.486 | -2.042 | 2.155  | O | -2.622 | -1.741 | 2.102  | O | -2.620 | -1.796 | 2.119  |
| O | -2.486 | -2.042 | -2.155 | O | -2.622 | -1.741 | -2.102 | O | -2.620 | -1.796 | -2.119 |
| O | -1.297 | 1.018  | 3.077  | O | -1.145 | 0.985  | 3.054  | O | -1.174 | 1.070  | 3.055  |
|   | -2.010 | 4.003  | 0.000  | O | -1.790 | 4.007  | 0.000  | O | -1.747 | 4.046  | 0.000  |

#### S-4 Thermodynamic parameters for 3 and 4 by DFT calculation with three functionals.

##### The estimation for the thermodynamic parameters of DFT calculation

The calculated thermodynamic parameters for the target complexes were obtained by DFT methodologies using Gaussian 03. Introduction for these calculations was reported by “*Thermochemistry in Gaussian*” on their web site; [http://www.gaussian.com/g\\_whitepap/thermo/thermo.pdf](http://www.gaussian.com/g_whitepap/thermo/thermo.pdf). The Gaussian’s output using option (Freq=anal) offers the thermodynamic parameters at 298.15 K temperature under 1 atm pressure. The following is an example of the output files showing the thermodynamic data under these conditions for the ground state of complex 3, which was obtained by using B3LYP functional.

~~~~~

-----  
- Thermochemistry -  
-----

| Temperature | 298.150 Kelvin.   | Pressure    | 1.00000 Atm. |
|-------------|-------------------|-------------|--------------|
| Atom 1      | has atomic number | 6 and mass  | 12.00000     |
| Atom 2      | has atomic number | 6 and mass  | 12.00000     |
| Atom 3      | has atomic number | 6 and mass  | 12.00000     |
| Atom 4      | has atomic number | 6 and mass  | 12.00000     |
| Atom 5      | has atomic number | 6 and mass  | 12.00000     |
| Atom 6      | has atomic number | 6 and mass  | 12.00000     |
| Atom 7      | has atomic number | 6 and mass  | 12.00000     |
| Atom 8      | has atomic number | 6 and mass  | 12.00000     |
| Atom 9      | has atomic number | 6 and mass  | 12.00000     |
| Atom 10     | has atomic number | 6 and mass  | 12.00000     |
| Atom 11     | has atomic number | 1 and mass  | 1.00783      |
| Atom 12     | has atomic number | 1 and mass  | 1.00783      |
| Atom 13     | has atomic number | 6 and mass  | 12.00000     |
| Atom 14     | has atomic number | 1 and mass  | 1.00783      |
| Atom 15     | has atomic number | 26 and mass | 55.93494     |
| Atom 16     | has atomic number | 26 and mass | 55.93494     |
| Atom 17     | has atomic number | 6 and mass  | 12.00000     |
| Atom 18     | has atomic number | 8 and mass  | 15.99491     |
| Atom 19     | has atomic number | 6 and mass  | 12.00000     |
| Atom 20     | has atomic number | 8 and mass  | 15.99491     |
| Atom 21     | has atomic number | 6 and mass  | 12.00000     |
| Atom 22     | has atomic number | 8 and mass  | 15.99491     |
| Atom 23     | has atomic number | 6 and mass  | 12.00000     |
| Atom 24     | has atomic number | 8 and mass  | 15.99491     |
| Atom 25     | has atomic number | 6 and mass  | 12.00000     |
| Atom 26     | has atomic number | 8 and mass  | 15.99491     |
| Atom 27     | has atomic number | 1 and mass  | 1.00783      |
| Atom 28     | has atomic number | 1 and mass  | 1.00783      |
| Atom 29     | has atomic number | 1 and mass  | 1.00783      |
| Atom 30     | has atomic number | 1 and mass  | 1.00783      |
| Atom 31     | has atomic number | 1 and mass  | 1.00783      |
| Atom 32     | has atomic number | 6 and mass  | 12.00000     |
| Atom 33     | has atomic number | 1 and mass  | 1.00783      |
| Atom 34     | has atomic number | 1 and mass  | 1.00783      |
| Atom 35     | has atomic number | 1 and mass  | 1.00783      |

Atom 36 has atomic number 6 and mass 12.00000  
 Atom 37 has atomic number 1 and mass 1.00783  
 Atom 38 has atomic number 1 and mass 1.00783  
 Atom 39 has atomic number 1 and mass 1.00783  
 Molecular mass: 421.95400 amu.

Principal axes and moments of inertia in atomic units:

|                | 1              | 2               | 3        |
|----------------|----------------|-----------------|----------|
| EIGENVALUES -- | 6506.700107921 | 642849122.56765 |          |
| X              | 1.00000        | 0.00104         | -0.00277 |
| Y              | -0.00088       | 0.99834         | 0.05752  |
| Z              | 0.00283        | -0.05751        | 0.99834  |

This molecule is an asymmetric top.

Rotational symmetry number 1.

Warning -- assumption of classical behavior for rotation  
 may cause significant error

|                                  |                       |         |         |
|----------------------------------|-----------------------|---------|---------|
| Rotational temperatures (Kelvin) | 0.01331               | 0.01093 | 0.00949 |
| Rotational constants (GHZ):      | 0.27737               | 0.22782 | 0.19783 |
| Zero-point vibrational energy    | 721238.9 (Joules/Mol) |         |         |
|                                  | 172.38024 (Kcal/Mol)  |         |         |

Warning -- explicit consideration of 47 degrees of freedom as  
 vibrations may cause significant error

| Vibrational temperatures:<br>(Kelvin) | 50.11   | 57.80   | 99.35   | 108.98  | 113.27  |
|---------------------------------------|---------|---------|---------|---------|---------|
|                                       | 120.02  | 140.10  | 141.19  | 151.34  | 172.19  |
|                                       | 180.88  | 202.37  | 234.80  | 240.57  | 248.18  |
|                                       | 258.50  | 275.10  | 285.79  | 309.55  | 349.14  |
|                                       | 403.44  | 425.87  | 445.25  | 457.53  | 478.82  |
|                                       | 521.59  | 541.17  | 557.17  | 588.79  | 615.58  |
|                                       | 637.66  | 647.50  | 669.63  | 673.06  | 707.61  |
|                                       | 709.94  | 720.37  | 735.99  | 751.69  | 771.49  |
|                                       | 787.31  | 795.69  | 814.57  | 822.35  | 840.84  |
|                                       | 864.92  | 876.01  | 896.43  | 906.83  | 928.02  |
|                                       | 940.98  | 998.72  | 1029.48 | 1196.98 | 1233.83 |
|                                       | 1238.63 | 1248.36 | 1300.96 | 1320.39 | 1354.64 |
|                                       | 1387.21 | 1436.75 | 1453.90 | 1501.61 | 1505.09 |
|                                       | 1516.11 | 1518.96 | 1541.35 | 1548.89 | 1604.40 |
|                                       | 1705.68 | 1711.12 | 1765.94 | 1817.06 | 1924.07 |
|                                       | 1963.87 | 1977.70 | 2011.95 | 2014.17 | 2019.47 |
|                                       | 2035.28 | 2065.96 | 2084.34 | 2089.36 | 2102.06 |
|                                       | 2107.28 | 2113.32 | 2117.04 | 2147.08 | 2171.49 |
|                                       | 2233.59 | 2436.14 | 2905.81 | 2910.78 | 2947.58 |
|                                       | 2952.48 | 3017.81 | 4337.62 | 4341.42 | 4354.82 |
|                                       | 4419.82 | 4441.99 | 4460.77 | 4491.22 | 4499.86 |
|                                       | 4502.80 | 4517.64 | 4529.96 | 4660.43 | 4681.26 |
|                                       | 4692.36 |         |         |         |         |

|                                              |                             |
|----------------------------------------------|-----------------------------|
| Zero-point correction=                       | 0.274705 (Hartree/Particle) |
| Thermal correction to Energy=                | 0.300116                    |
| Thermal correction to Enthalpy=              | 0.301061                    |
| Thermal correction to Gibbs Free Energy=     | 0.220745                    |
| Sum of electronic and zero-point Energies=   | -1317.036267                |
| Sum of electronic and thermal Energies=      | -1317.010856                |
| Sum of electronic and thermal Enthalpies=    | -1317.009911                |
| Sum of electronic and thermal Free Energies= | -1317.090228                |

Table S-4-A

|               | E (Thermal)<br>KCal/Mol | C <sub>v</sub><br>Cal/Mol-Kelvin | S<br>Cal/Mol-Kelvin |
|---------------|-------------------------|----------------------------------|---------------------|
| Total         | 188.326                 | 95.212                           | 169.039             |
| Electronic    | 0.000                   | 0.000                            | 0.000               |
| Translational | 0.889                   | 2.981                            | 44.010              |
| Rotational    | 0.889                   | 2.981                            | 34.507              |
| Vibrational   | 186.548                 | 89.250                           | 90.522              |

Table S-4-B

From the above Gaussian's output, we obtained the thermodynamic parameters as shown in Table S-4-A.

| Table S-4-A |                                             |                                         |
|-------------|---------------------------------------------|-----------------------------------------|
| entry       |                                             | the values of energy (Hartree/Particle) |
| 0           | The total electronic energy                 | -1317.310972                            |
| 1           | Zero-point correction                       | 0.274705                                |
| 2           | Thermal correction to Energy                | 0.300116                                |
| 3           | Thermal correction to Enthalpy              | 0.301061                                |
| 4           | Thermal correction to Gibbs Free Energy     | 0.220745                                |
| 5           | Sum of electronic and zero-point Energies   | -1317.036267                            |
| 6           | Sum of electronic and thermal Energies      | -1317.010856                            |
| 7           | Sum of electronic and thermal Enthalpies    | -1317.009911                            |
| 8           | Sum of electronic and thermal Free Energies | -1317.090228                            |

The data summarized in entries 1-8 are those described in the output file shown in page 14. The content of entry 0 is listed in the other part of the same output file, which is not described in this supporting information.

Each entry on this table shows the following value:

- 1: The zero-point energy is calculated using only the non-imaginary frequencies.
- 2: Internal thermal correction to energy ( $E_{tot}$ ) collects the internal thermal energies from translation, rotation, molecular vibration and electronic motion partition functions:

$$E_{tot} = E_t + E_r + E_v + E_e \quad (\text{eq.S-1})$$

$E_t$ : internal thermal energy due to translation

$E_r$ : internal thermal energy due to rotation (for non linear polyatomic molecule)

$E_v$ : internal thermal energy due to molecular vibration

$E_e$ : internal thermal energy due to electronic motion

We demonstrate the each internal thermal energy on Table S-4-B.

Thermal correction to entropy ( $S_{tot}$ ) can also be obtained from corresponding four contributions:

$$S_{tot} = S_t + S_r + S_v + S_e \quad (\text{eq.S-2})$$

$S_t$ : the entropy contribution due to translation

$S_r$ : the entropy contribution due to rotation  
(for non linear polyatomic molecule)

$S_v$ : the entropy contribution due to molecular vibration

$S_e$ : the entropy contribution due to electronic motion

- 3: Internal thermal correction to Enthalpy ( $H_{corr}$ ) summate thermal correction to energy  $E_{tot}$  and Boltzmann's temperature ( $k_B T$ ) where  $k_B$  is Boltzmann's constant.

$$H_{corr} = E_{tot} + k_B T \quad (\text{eq.S-3})$$

- 4: Internal thermal correction to Gibbs Free Energy ( $G_{corr}$ ) can be derived as following standard relation:

$$G_{corr} = H_{corr} - TS_{tot} \quad (\text{eq. S-4})$$

The total electronic energy ( $\varepsilon_0$ ) added to zero-point Energies (1), internal thermal energies (2), internal enthalpies (3) and internal thermal Gibbs free energies (4) make entries 5-8, respectively.

| Table S-4-A2 Total electronic energies, zero-point energies, thermal energies, thermal enthalpies and thermal Gibbs free energies on ground state for complexes <b>3</b> using B3LYP functional at 298.15K under 1atm. |                      |
|------------------------------------------------------------------------------------------------------------------------------------------------------------------------------------------------------------------------|----------------------|
|                                                                                                                                                                                                                        | Ground state (B3LYP) |
| $\varepsilon_0$ (au.)                                                                                                                                                                                                  | -1317.31097          |
| ZP (au.)                                                                                                                                                                                                               | -1317.03627          |
| $E_{thm}$ (au.)                                                                                                                                                                                                        | -1317.01086          |
| H (au.)                                                                                                                                                                                                                | -1317.00991          |
| G (au.)                                                                                                                                                                                                                | -1317.09023          |

Table S-4-B shows the each internal energy in eq. S-1. These energies convert to KCal/Mol or Cal/Mol-Kelvin unit using the relation of physical constant; 1Hartree = 627.50959 kcal.

| Table S-4-B |               |                        |                         |                     |
|-------------|---------------|------------------------|-------------------------|---------------------|
| entry       | Motion        | E(Thermal)<br>KCal/Mol | $C_v$<br>Cal/Mol-Kelvin | S<br>Cal/Mol-Kelvin |
| 1           | Total         | 188.326                | 95.212                  | 169.039             |
| 2           | Electronic    | 0.000                  | 0.000                   | 0.000               |
| 3           | Translational | 0.889                  | 2.981                   | 44.010              |
| 4           | Rotational    | 0.889                  | 2.981                   | 34.507              |
| 5           | Vibrational   | 186.548                | 89.250                  | 90.522              |



These data show the parameters which are necessary for the estimation of  $\Delta E_{\text{therm}}$ ,  $\Delta H$ ,  $\Delta G$  and  $\Delta S$ . In similar fashion, the data of **3** and **4** on ground states and transition states calculated by using B3LYP, B1B95 and PBE1PBE functionals are summarized in Table S-4-1 and Table S-4-2, which includes the data of **3** described above for comparison. Estimated  $\Delta E_{\text{therm}}$ ,  $\Delta H$ ,  $\Delta G$  and  $\Delta S$  by these data are summarized in Table S-4-3.

**Table S-4-1.** Internal thermal total entropy ( $S_{tot}$ ) for complexes **3** and **4** using three density functional; B3LYP, B1B95 and PBE1PBE at 298.15K under 1atm.

| Complex               | Ground state (298.15K) |         |         |               |         |         | Transition state (298K) |         |         |               |         |         |
|-----------------------|------------------------|---------|---------|---------------|---------|---------|-------------------------|---------|---------|---------------|---------|---------|
|                       | <b>3</b> (Fe)          |         |         | <b>4</b> (Ru) |         |         | <b>3</b> (Fe)           |         |         | <b>4</b> (Ru) |         |         |
|                       | B3LYP                  | B1B95   | PBE1PBE | B3LYP         | B1B95   | PBE1PBE | B3LYP                   | B1B95   | PBE1PBE | B3LYP         | B1B95   | PBE1PBE |
| $S_{tot}$ (cal/mol-K) | 169.039                | 166.454 | 166.821 | 176.134       | 173.238 | 173.285 | 167.747                 | 167.851 | 165.222 | 179.970       | 176.249 | 178.433 |
| $S_t$ (cal/mol-K)     | 44.010                 | 44.010  | 44.010  | 44.597        | 44.597  | 44.597  | 44.010                  | 44.010  | 44.010  | 44.597        | 44.597  | 44.597  |
| $S_r$ (cal/mol-K)     | 34.507                 | 34.386  | 34.417  | 34.940        | 34.826  | 34.850  | 34.532                  | 34.415  | 34.423  | 34.952        | 34.826  | 34.862  |
| $S_v$ (cal/mol-K)     | 90.522                 | 88.059  | 88.395  | 96.597        | 93.815  | 93.837  | 89.205                  | 89.427  | 86.790  | 100.421       | 96.826  | 98.974  |
| $S_e$ (cal/mol-K)     | 0                      | 0       | 0       | 0             | 0       | 0       | 0                       | 0       | 0       | 0             | 0       | 0       |

**Table S-4-2.** Total electronic energies, zero-point energies, thermal energies, thermal enthalpies and thermal Gibbs free energies on ground states and transition states for complexes **3** and **4** using three density functional; B3LYP, B1B95 and PBE1PBE at 298.15K under 1atm.

|                  | <b>3</b> (Fe) |                  |              |                  |                |                  | <b>4</b> (Ru) |                  |              |                  |                |                  |
|------------------|---------------|------------------|--------------|------------------|----------------|------------------|---------------|------------------|--------------|------------------|----------------|------------------|
|                  | <u>B3LYP</u>  |                  | <u>B1B95</u> |                  | <u>PBE1PBE</u> |                  | <u>B3LYP</u>  |                  | <u>B1B95</u> |                  | <u>PBE1PBE</u> |                  |
|                  | Ground state  | Transition state | Ground state | Transition state | Ground state   | Transition state | Ground state  | Transition state | Ground state | Transition state | Ground state   | Transition state |
| $e_0$ (au.)      | -1317.31097   | -1317.26772      | -1316.87649  | -1316.82412      | -1316.00850    | -1315.95542      | -1258.62056   | -1258.59021      | -1258.11341  | -1258.07308      | -1257.38182    | -1257.34276      |
| ZP (au.)         | -1317.03627   | -1316.99459      | -1316.59815  | -1316.54801      | -1315.73043    | -1315.67942      | -1258.34841   | -1258.31896      | -1257.83786  | -1257.79873      | -1257.10646    | -1257.06847      |
| $E_{thrm}$ (au.) | -1317.01086   | -1316.96953      | -1316.57333  | -1316.52319      | -1315.70553    | -1315.65481      | -1258.32196   | -1258.29206      | -1257.81195  | -1257.77291      | -1257.08056    | -1257.04202      |
| H (au.)          | -1317.00991   | -1316.96859      | -1316.57238  | -1316.52224      | -1315.70459    | -1315.65386      | -1258.32102   | -1258.29111      | -1257.81100  | -1257.77196      | -1257.07962    | -1257.04107      |
| G (au.)          | -1317.09023   | -1317.04829      | -1316.65147  | -1316.60197      | -1315.78385    | -1315.73236      | -1258.40471   | -1258.37662      | -1257.89331  | -1257.85571      | -1257.16195    | -1257.12585      |

**Table S-4-3.** Thermodynamic parameters for **3** and **4** by DFT calculation with three functionals.(at 298.15K)

| <u>Complex</u>                       | <b>3 (Fe)</b> |              |                | <b>4 (Ru)</b> |              |                |
|--------------------------------------|---------------|--------------|----------------|---------------|--------------|----------------|
|                                      | <u>B3LYP</u>  | <u>BIB95</u> | <u>PBE1PBE</u> | <u>B3LYP</u>  | <u>BIB95</u> | <u>PBE1PBE</u> |
| K                                    | 298.15        | 298.15       | 298.15         | 298.15        | 298.15       | 298.15         |
| $\Delta E_{\text{thrm}}$ (kcal/mol.) | 25.93         | 31.46        | 31.83          | 18.77         | 24.50        | 24.19          |
| $\Delta H$ (kcal/mol.)               | 25.93         | 31.46        | 31.83          | 18.77         | 24.50        | 24.19          |
| $\Delta G$ (kcal/mol.)               | 26.32         | 31.06        | 32.31          | 17.62         | 23.60        | 22.65          |
| $\Delta S$ (cal/mol.)                | -1.29         | 1.35         | -1.60          | 3.84          | 3.01         | 5.15           |

In similar ways, the following procedures gave the thermodynamic parameters at 373K, which is in our experimental condition on the present study, using freqchk utility program.

Then, we used the total electronic energy ( $\epsilon_0$ ), which is not related to thermal factor, was obtained at the result of condition at 298.15K.

A representative freqchk's output file is shown in p19-20, tables of parameters are summarized in p21-23.

```
~~~~~  
-----  
- Thermochemistry -  
-----  
Temperature 373.000 Kelvin. Pressure 1.00000 Atm.  
Molecular mass: 421.95400 amu.  
Principal axes and moments of inertia in atomic units:  
                1           2           3  
EIGENVALUES -- 6506.700107921.642849122.56765  
X              0.76711  -0.47082  -0.43574  
Y              0.18063  -0.49323   0.85094  
Z              0.61556   0.73147   0.29333  
  
This molecule is an asymmetric top.  
Rotational symmetry number 1.  
Warning -- assumption of classical behavior for rotation  
            may cause significant error  
Rotational temperatures (Kelvin)      0.01331      0.01093      0.00949  
Rotational constants (GHZ):           0.27737      0.22782      0.19783  
Zero-point vibrational energy      721238.9 (Joules/Mol)  
                                   172.38024 (Kcal/Mol)  
Warning -- explicit consideration of 53 degrees of freedom as  
            vibrations may cause significant error  
Vibrational temperatures: 50.11  57.80  99.35  108.98  113.27  
            (Kelvin)      120.02  140.10  141.19  151.34  172.19  
                        180.88  202.37  234.80  240.57  248.18  
                        258.50  275.10  285.79  309.55  349.14  
                        403.44  425.87  445.25  457.53  478.82  
                        521.59  541.17  557.17  588.79  615.58  
                        637.66  647.50  669.63  673.06  707.61
```

|         |         |         |         |         |
|---------|---------|---------|---------|---------|
| 709.94  | 720.37  | 735.99  | 751.69  | 771.49  |
| 787.31  | 795.69  | 814.57  | 822.35  | 840.84  |
| 864.92  | 876.01  | 896.43  | 906.83  | 928.02  |
| 940.98  | 998.72  | 1029.48 | 1196.98 | 1233.83 |
| 1238.63 | 1248.36 | 1300.96 | 1320.39 | 1354.64 |
| 1387.21 | 1436.75 | 1453.90 | 1501.61 | 1505.09 |
| 1516.11 | 1518.96 | 1541.35 | 1548.89 | 1604.40 |
| 1705.68 | 1711.12 | 1765.94 | 1817.06 | 1924.07 |
| 1963.87 | 1977.70 | 2011.95 | 2014.17 | 2019.47 |
| 2035.28 | 2065.96 | 2084.34 | 2089.36 | 2102.06 |
| 2107.28 | 2113.32 | 2117.04 | 2147.08 | 2171.49 |
| 2233.59 | 2436.14 | 2905.81 | 2910.78 | 2947.58 |
| 2952.48 | 3017.81 | 4337.62 | 4341.42 | 4354.82 |
| 4419.82 | 4441.99 | 4460.77 | 4491.22 | 4499.86 |
| 4502.80 | 4517.64 | 4529.96 | 4660.43 | 4681.26 |
| 4692.36 |         |         |         |         |

Zero-point correction= 0.274705 (Hartree/Particle)  
Thermal correction to Energy= 0.312442  
Thermal correction to Enthalpy= 0.313624  
Thermal correction to Gibbs Free Energy= 0.199161

|               | E (Thermal)<br>KCal/Mol | C <sub>v</sub><br>Cal/Mol-Kelvin | S<br>Cal/Mol-Kelvin |
|---------------|-------------------------|----------------------------------|---------------------|
| Total         | 196.061                 | 111.055                          | 192.563             |
| Electronic    | 0.000                   | 0.000                            | 0.000               |
| Translational | 1.112                   | 2.981                            | 45.122              |
| Rotational    | 1.112                   | 2.981                            | 35.175              |
| Vibrational   | 193.837                 | 105.094                          | 112.266             |

~~~~~

**Table S-4-4.** Internal thermal total energy ( $E_{tot}$ ) for complexes **3** and **4** using three density functional; B3LYP, B1B95 and PBE1PBE at 373K under 1atm.

| Complex              | Ground state  |         |         |               |         |         | Transition state |         |         |               |         |         |
|----------------------|---------------|---------|---------|---------------|---------|---------|------------------|---------|---------|---------------|---------|---------|
|                      | <b>3</b> (Fe) |         |         | <b>4</b> (Ru) |         |         | <b>3</b> (Fe)    |         |         | <b>4</b> (Ru) |         |         |
|                      | Function      | B3LYP   | B1B95   | PBE1PBE       | B3LYP   | B1B95   | PBE1PBE          | B3LYP   | B1B95   | PBE1PBE       | B3LYP   | B1B95   |
| $E_{tot}$ (kcal/mol) | 196.061       | 197.888 | 197.755 | 195.250       | 196.974 | 196.834 | 194.779          | 196.418 | 196.408 | 195.003       | 196.049 | 196.552 |
| $E_t$ (kcal/mol)     | 1.112         | 1.112   | 1.112   | 1.112         | 1.112   | 1.112   | 1.112            | 1.112   | 1.112   | 1.112         | 1.112   | 1.112   |
| $E_r$ (kcal/mol)     | 1.112         | 1.112   | 1.112   | 1.112         | 1.112   | 1.112   | 1.112            | 1.112   | 1.112   | 1.112         | 1.112   | 1.112   |
| $E_v$ (kcal/mol)     | 193.837       | 195.664 | 195.531 | 193.026       | 194.750 | 194.610 | 192.555          | 194.195 | 194.184 | 192.779       | 193.825 | 194.329 |
| $E_c$ (kcal/mol)     | 0             | 0       | 0       | 0             | 0       | 0       | 0                | 0       | 0       | 0             | 0       | 0       |

**Table S-4-5.** Internal thermal total entropy ( $S_{tot}$ ) for complexes **3** and **4** using three density functional; B3LYP, B1B95 and PBE1PBE at 373K under 1atm.

| Complex               | Ground state  |         |         |               |         |         | Transition state |         |         |               |         |         |
|-----------------------|---------------|---------|---------|---------------|---------|---------|------------------|---------|---------|---------------|---------|---------|
|                       | <b>3</b> (Fe) |         |         | <b>4</b> (Ru) |         |         | <b>3</b> (Fe)    |         |         | <b>4</b> (Ru) |         |         |
|                       | Function      | B3LYP   | B1B95   | PBE1PBE       | B3LYP   | B1B95   | PBE1PBE          | B3LYP   | B1B95   | PBE1PBE       | B3LYP   | B1B95   |
| $S_{tot}$ (cal/mol·K) | 192.563       | 189.735 | 190.059 | 200.086       | 196.960 | 196.980 | 190.997          | 190.933 | 188.240 | 204.009       | 199.636 | 202.255 |
| $S_t$ (cal/mol·K)     | 45.122        | 45.122  | 45.122  | 45.710        | 45.710  | 45.710  | 45.122           | 45.122  | 45.122  | 45.710        | 45.710  | 45.710  |
| $S_r$ (cal/mol·K)     | 35.175        | 35.053  | 35.084  | 35.607        | 35.493  | 35.518  | 35.200           | 35.083  | 35.090  | 35.619        | 35.493  | 35.529  |
| $S_v$ (cal/mol·K)     | 112.266       | 109.559 | 109.852 | 118.769       | 115.756 | 115.752 | 110.674          | 110.728 | 108.028 | 122.680       | 118.433 | 121.016 |
| $S_c$ (cal/mol·K)     | 0             | 0       | 0       | 0             | 0       | 0       | 0                | 0       | 0       | 0             | 0       | 0       |

**Table S-4-6.** Internal thermal total energies, enthalpies and thermal Gibbs free energies on ground states and transition states for complexes **3** and **4** using three density functional; B3LYP, B1B95 and PBE1PBE at 373K under 1atm.

|                         | <b>3 (Fe)</b> |                  |              |                  |                |                  | <b>4 (Ru)</b> |                  |              |                  |                |                  |
|-------------------------|---------------|------------------|--------------|------------------|----------------|------------------|---------------|------------------|--------------|------------------|----------------|------------------|
|                         | <u>B3LYP</u>  |                  | <u>B1B95</u> |                  | <u>PBE1PBE</u> |                  | <u>B3LYP</u>  |                  | <u>B1B95</u> |                  | <u>PBE1PBE</u> |                  |
|                         | Ground state  | Transition state | Ground state | Transition state | Ground state   | Transition state | Ground state  | Transition state | Ground state | Transition state | Ground state   | Transition state |
| $E_{\text{tot}}$ (au.)  | 0.312442      | 0.31040          | 0.315355     | 0.31301          | 0.31514        | 0.31300          | 0.31115       | 0.310757         | 0.31390      | 0.312424         | 0.31368        | 0.313226         |
| $H_{\text{corr}}$ (au.) | 0.313624      | 0.31158          | 0.316536     | 0.31419          | 0.31632        | 0.31418          | 0.31233       | 0.311938         | 0.31508      | 0.313605         | 0.31486        | 0.314407         |
| $G_{\text{corr}}$ (au.) | 0.199161      | 0.19805          | 0.203755     | 0.20070          | 0.20335        | 0.20228          | 0.19340       | 0.190673         | 0.19800      | 0.194938         | 0.19777        | 0.194184         |

**Table S-4-7.** Total thermal energies, thermal enthalpies and thermal Gibbs free energies on ground states and transition states for complexes **3** and **4** using three density functional; B3LYP, B1B95 and PBE1PBE at 373K under 1atm.

|                        | <b>3 (Fe)</b> |                  |              |                  |                |                  | <b>4 (Ru)</b> |                  |              |                  |                |                  |
|------------------------|---------------|------------------|--------------|------------------|----------------|------------------|---------------|------------------|--------------|------------------|----------------|------------------|
|                        | <u>B3LYP</u>  |                  | <u>B1B95</u> |                  | <u>PBE1PBE</u> |                  | <u>B3LYP</u>  |                  | <u>B1B95</u> |                  | <u>PBE1PBE</u> |                  |
|                        | Ground state  | Transition state | Ground state | Transition state | Ground state   | Transition state | Ground state  | Transition state | Ground state | Transition state | Ground state   | Transition state |
| $E_{\text{thm}}$ (au.) | -1316.99853   | -1316.95732      | -1316.56113  | -1316.51111      | -1315.69336    | -1315.64242      | -1258.30941   | -1258.27946      | -1257.79952  | -1257.76066      | -1257.06815    | -1257.02953      |
| $H$ (au.)              | -1316.99735   | -1316.95614      | -1316.55995  | -1316.50992      | -1315.69218    | -1315.64124      | -1258.30823   | -1258.27828      | -1257.79834  | -1257.75947      | -1257.06697    | -1257.02835      |
| $G$ (au.)              | -1317.11181   | -1317.06967      | -1316.67273  | -1316.62342      | -1315.80515    | -1315.75313      | -1258.42716   | -1258.39954      | -1257.91541  | -1257.87814      | -1257.18405    | -1257.14857      |

**Table S-4-8.** Thermodynamic parameters for **3** and **4** by DFT calculation with three functionals at 373K under 1atm.

| <u>Complex</u>                       | <b>3 (Fe)</b> |              |                | <b>4 (Ru)</b> |              |                |
|--------------------------------------|---------------|--------------|----------------|---------------|--------------|----------------|
|                                      | <u>B3LYP</u>  | <u>B1B95</u> | <u>PBE1PBE</u> | <u>B3LYP</u>  | <u>B1B95</u> | <u>PBE1PBE</u> |
| <b>K</b>                             | 373           | 373          | 373            | 373           | 373          | 373            |
| $\Delta E_{\text{thrm}}$ (kcal/mol.) | 25.86         | 31.39        | 31.97          | 18.80         | 24.39        | 24.23          |
| $\Delta H$ (kcal/mol.)               | 25.86         | 31.39        | 31.97          | 18.80         | 24.39        | 24.23          |
| $\Delta G$ (kcal/mol.)               | 26.44         | 30.94        | 32.64          | 17.33         | 23.39        | 22.26          |
| $\Delta S$ (cal/mol.)                | -1.57         | 1.20         | -1.82          | 3.92          | 2.68         | 5.28           |

1 (au) = 627.50959 (kcal)

The  $\Delta E_{\text{thrm}}$ ,  $\Delta H$ ,  $\Delta G$  and  $\Delta S$  estimated for **3** and **4** by the theoretical study at 373K (Table S-4-8) can be compared with those determined experimentally (Table S-4-9).  $\Delta E_{\text{thrm}}$ ,  $\Delta H$  and  $\Delta G$  of the complex **3** and **4** calculated by using the B3LYP functionale are smaller than those estimated using the B1B95 or PBE1PBE functionale. The PBE1PBE method provided  $\Delta H$ ,  $\Delta G$  and  $\Delta S$  for **4** close to those determine experimentally; however, these are substantial difference in  $\Delta H$  and  $\Delta G$  for **3** between the calculations and experiments. Although  $\Delta H$  is often used as a standard for estimate the accuracy of the calculation, all of the  $\Delta H$ s shown in Table S-4-8 are not very consistent with those determined experimentally. This may be attributed to the level of the calculation or solvent effect may be a part of the reasons. From the other standpoint, the  $\Delta H$ ,  $\Delta G$  and  $\Delta S$  of **4** calculated by using the PBE1PBE are roughly in accord with those determined experimentally; in contrast, the data of **3** determined experimentally are rather similar to those calculated by using the B3LYP. These seem to be attributed to the method to estimate the thermodynamic parameters of the iron and ruthenium complex.

At present stage, we concluded that the comparison in thermodynamic parameters between theory and experiment requires further investigation giving the calculation method guaranteed more accuracy.

**Table S-4-9** Thermodynamic parameters for the rearrangements of **3** and **4** obtained by experimental study.

|                                                              | <b>3</b> | <b>4</b> |
|--------------------------------------------------------------|----------|----------|
| $\Delta G_{373}^\ddagger$ (kcal mol <sup>-1</sup> )          | 25 ± 1   | 23 ± 1   |
| $\Delta H^\ddagger$ (kcal mol <sup>-1</sup> )                | 22 ± 1   | 25 ± 1   |
| $\Delta S^\ddagger$ (cal mol <sup>-1</sup> K <sup>-1</sup> ) | -7 ± 1   | 7 ± 1    |

Determined by the SST experiments. Experimental errors were determined by the least squares of the Eyring plot. Note that the T1, which is the basis to calculate k, contains ~10% experimental errors.
